# Supplementary material
Source: Frontiers journal article supplement (https://www.frontiersin.org/articles/290704)
Supplement: Image_1.PDF [file Image_1.PDF]

## Supplementary Material

### AR-13, a celecoxib derivative, directly kills *Francisella* *in vitro* and aids clearance and mouse survival *in vivo*

Ky Van Hoang<sup>1</sup>, Haley E. Adcox<sup>1</sup>, James R. Fitch<sup>2</sup>, David M. Gordon<sup>2</sup>, Heather Curry<sup>1</sup>, Larry S. Schlesinger<sup>1</sup>, Peter White<sup>2,3</sup> and John S. Gunn<sup>1\*</sup>

<sup>1</sup>Center for Microbial Interface Biology, Department of Microbial Infection and Immunity, The Ohio State University, Columbus OH 43210; <sup>2</sup>The Institute for Genomic Medicine, Nationwide Children's Hospital, 700 Children's Drive, Columbus OH 43205; <sup>3</sup>The Ohio State University College of Medicine, Department of Pediatrics, Columbus OH 43210.

Corresponding author: John S. Gunn, E-mail: [gunn.43@osu.edu](mailto:gunn.43@osu.edu)

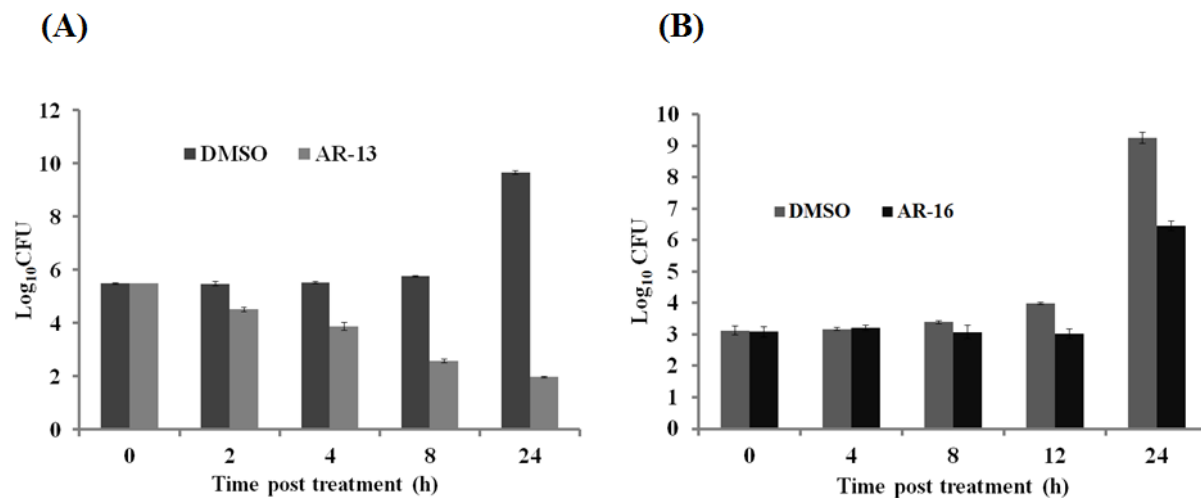

**Supplementary Figure 1.** Approximately  $5-6 \times 10^5$  CFUs of LVS were incubated while shaking at 37°C in 1 ml mTSB containing 10 µg of AR-13 (A) or AR-16 (B). Viable bacteria were evaluated at different time-points by serial dilution and plating. Data are representative of three independent experiments, each performed in triplicate.

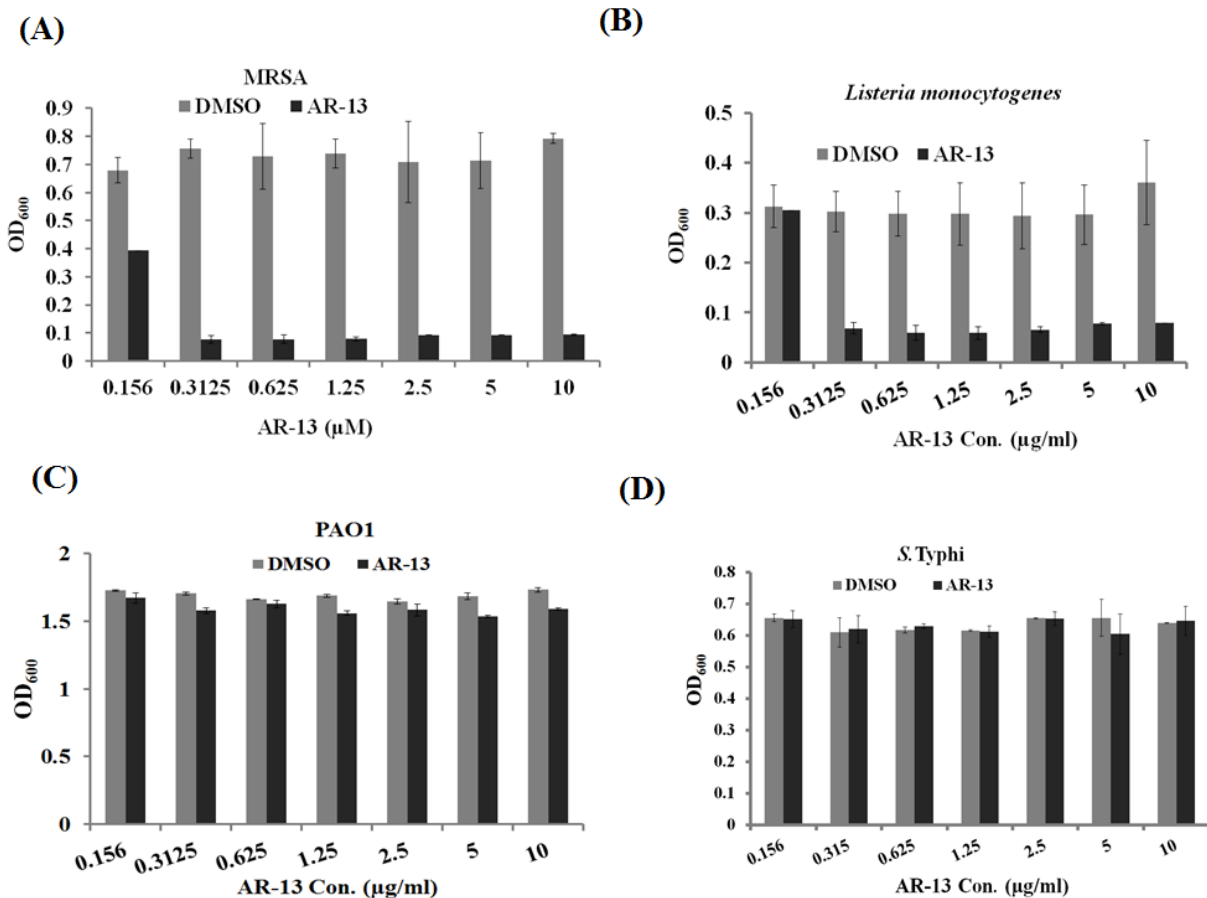

**Supplementary Figure 2.** Bacteria were grown in 2-fold serial dilutions of AR-13 in (A) mTSB (MRSA, strain JE2), (B) BHI (*L. monocytogenes*, strain 10403S), (C) LB (*P. aeruginosa* strain PAO1) and (D) *S. Typhi* Ty2. Optical densities at 600nm (OD<sub>600</sub>) were measured by a plate reader at 24h post-inoculation. Two to three independent experiments were performed for each bacterium, with triplicate cultures in each experiment. Representative data are presented.

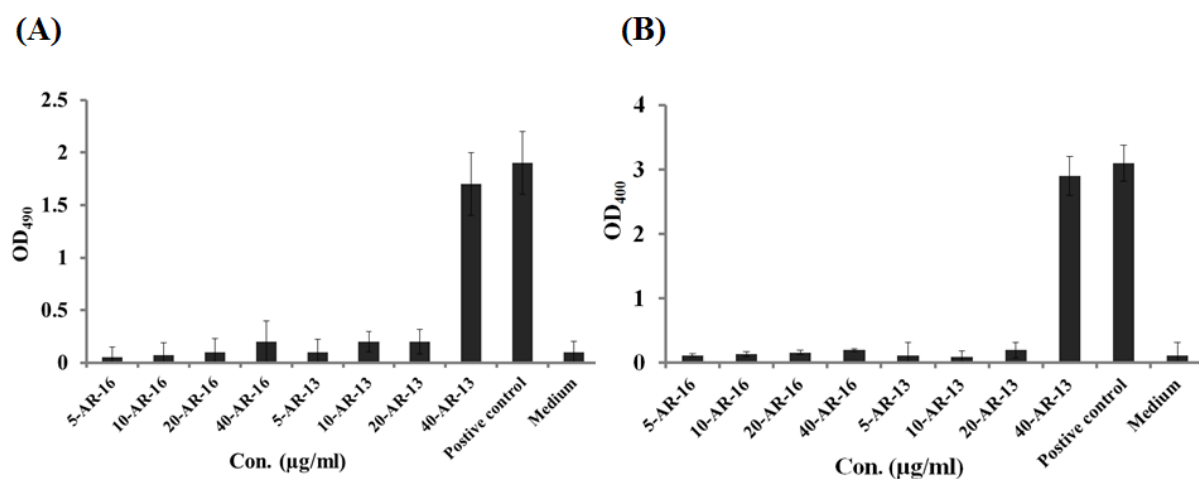

**Supplementary Figure 3.** Cytotoxicity of human monocyte-derived macrophages (hMDMs) cultured in the absence or presence of AR-13 or AR-16 for 24h (A) and 48h (B). Cytotoxicity was determined as LDH release measured at OD<sub>490</sub>. A positive control (0.2% Triton X-100) was included. Experiments were repeated two times (each in triplicate) and the data from one experiment is presented.

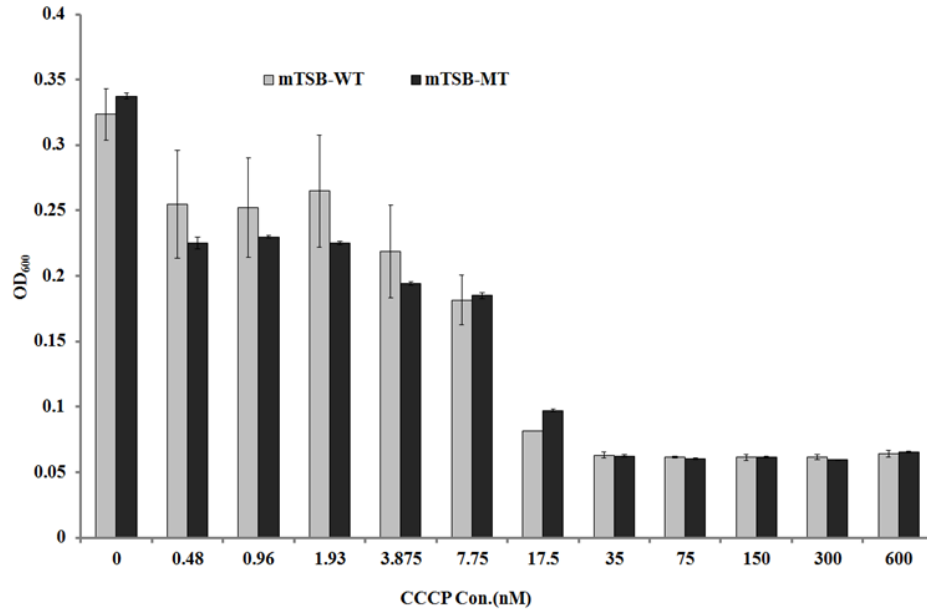

**Supplementary Figure 4.** Growth curve of a AR-13<sup>r</sup> mutant (MT) and wild type LVS (WT) in varied concentrations of CCCP. LVS was grown in a 2-fold serial dilution of CCCP in mTSB. Optical densities at 600nm (OD<sub>600</sub>) were measured by a plate reader at 18h post-inoculation. Experiments were repeated two times (each in triplicate) and the data from one experiment was presented.

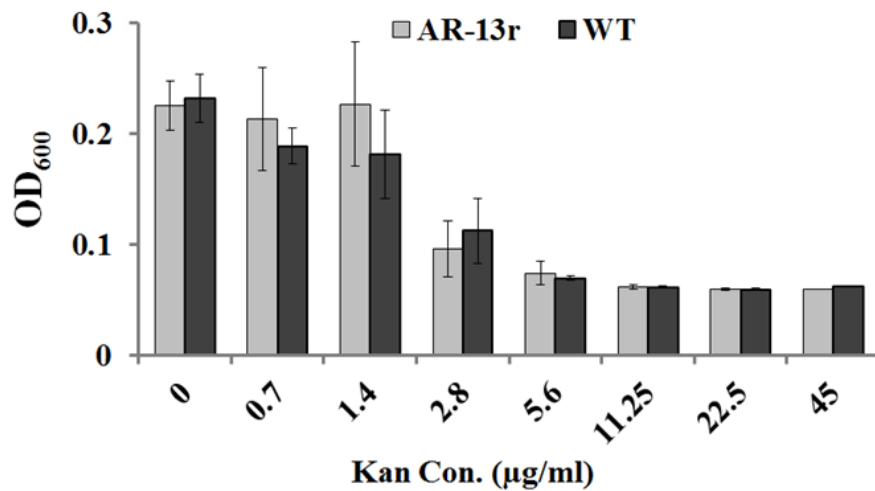

**Supplementary Figure 5.** An AR-13<sup>r</sup> mutant does not confer resistance to kanamycin. LVS was grown in 2-fold serial dilutions of kanamycin in mTSB. Optical densities at 600nm (OD<sub>600</sub>) were

measured by a plate reader at 18h post-inoculation. Experiments were repeated two times (each in triplicate) and the data from one experiment was presented.

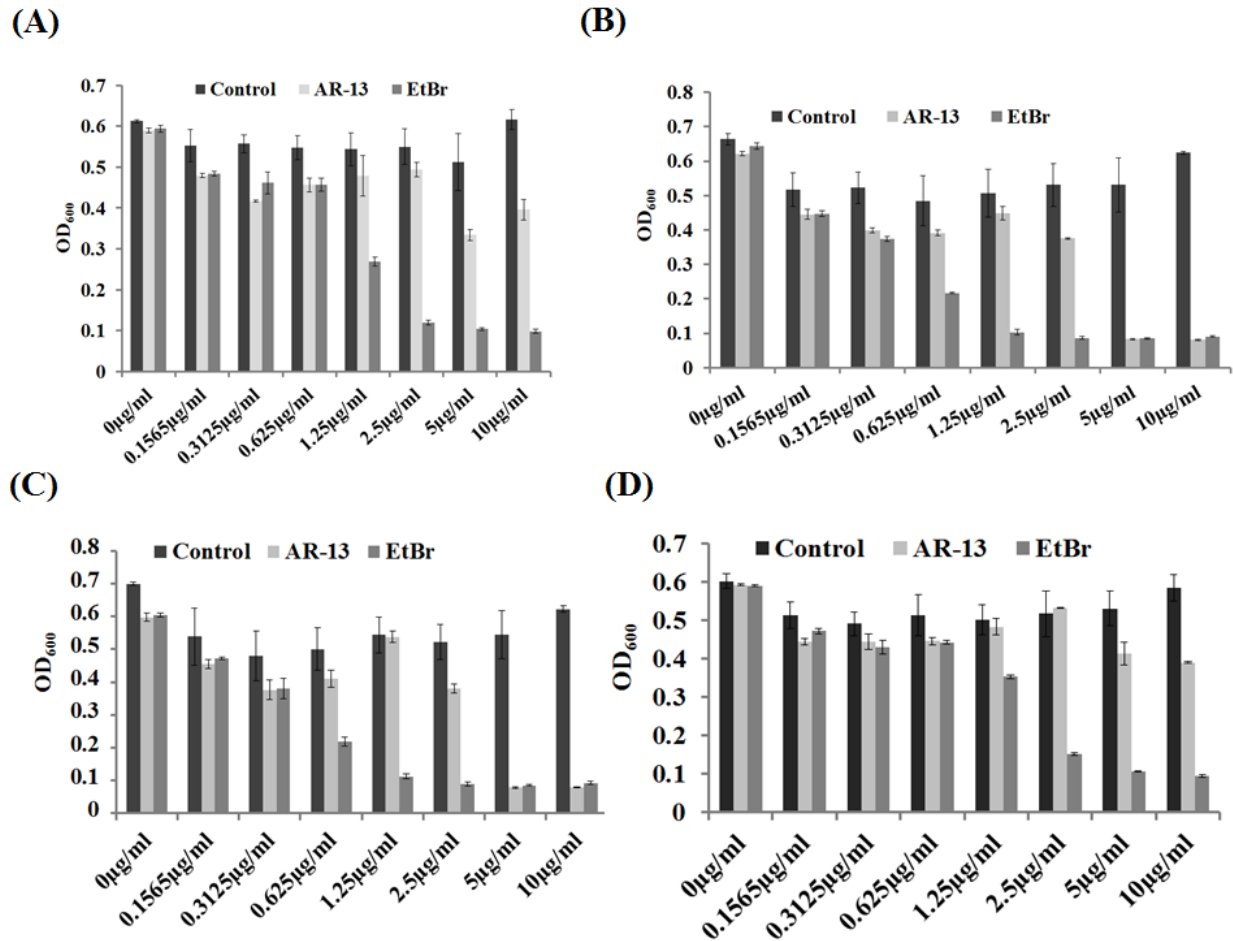

**Supplementary Figure 6.** Mutations in efflux pump genes but not an O-antigen synthesis gene (*wbtH*) confer AR-13 resistance in *F. novicida* (Fn). Wild type Fn, together with efflux pump and *wbtH* mutants, were examined for sensitivity to AR-13 in mTSB; ethidium bromide was included as a control. (A) The growth of wild type Fn was partially inhibited by >5 µg of AR-13/ml and >1.25 µg of EtBr. Transposon insertions in (B) *tolC* (FTN\_0779) and (C) *fltC* (FTN\_1703) increased susceptibility of these mutants to AR-13 (no growth was observed at 5 µg of AR-13/ml). (D) A *wbtH* (FTN\_1421) mutant is only weakly affected by AR-13 concentrations of >5 µg of AR-13/ml. The experiment was performed 2-3 times in triplicate with at least three independent transposon mutants obtained from a BEI Resources library for each gene.
